# Supplementary material for: Immune cell infiltration as a biomarker for the diagnosis and prognosis of digestive system cancer
Source: PubMed Central journal article supplement — Cancer Sci. 2019 Nov 2;110(12):3639–49. doi: 10.1111/cas.14216 (PMC6890448; doi:10.1111/cas.14216), 2019-11-02
Supplement: CAS-110-3639-s010.pdf [file CAS-110-3639-s010.pdf]

**Supplementary table 2. Coefficients of immune cell markers in diagnosis analysis**

| Immune cell marker           | Coefficients |
|------------------------------|--------------|
| B cells naive                | 0.520        |
| Plasma cells                 | 9.710        |
| T cells CD4 memory activated | -5.601       |
| Monocytes                    | 5.640        |
| Macrophages M0               | -4.857       |
| Mast cells resting           | 8.246        |
