# Supplementary material for: Immune cell infiltration as a biomarker for the diagnosis and prognosis of digestive system cancer
Source: PubMed Central journal article supplement — Cancer Sci. 2019 Nov 2;110(12):3639–49. doi: 10.1111/cas.14216 (PMC6890448; doi:10.1111/cas.14216), 2019-11-02
Supplement: CAS-110-3639-s012.pdf [file CAS-110-3639-s012.pdf]

**Supplementary table 4. Coefficients of immune cell markers in prognosis analysis**

| Immune cell marker           | Coefficients |
|------------------------------|--------------|
| B cells naive                | -0.207       |
| T cells CD8                  | -0.008       |
| T cells CD4 naive            | 0.195        |
| T cells CD4 memory activated | -0.221       |
| T cells follicular helper    | -0.083       |
| T cells regulatory (Tregs)   | 0.055        |
| Macrophages M2               | 0.272        |
| Mast cells resting           | 0.045        |
| Eosinophils                  | -0.101       |
