# Supplementary material for: Immune cell infiltration as a biomarker for the diagnosis and prognosis of digestive system cancer
Source: PubMed Central journal article supplement — Cancer Sci. 2019 Nov 2;110(12):3639–49. doi: 10.1111/cas.14216 (PMC6890448; doi:10.1111/cas.14216), 2019-11-02
Supplement: CAS-110-3639-s013.pdf [file CAS-110-3639-s013.pdf]

**Supplementary table 5. Subgroup analyses of prognosis-immune-score in the entire cohort**

| Item                  |                  | Mean PIS | p-value |
|-----------------------|------------------|----------|---------|
| <b>age</b>            | 18-64            | -0.079   | 0.151   |
|                       | > 64             | -0.105   |         |
| <b>gender</b>         | Male             | -0.086   | 0.412   |
|                       | Female           | -0.101   |         |
| <b>stage</b>          | I                | -0.123   | 0.007   |
|                       | II               | -0.062   |         |
|                       | III              | -0.130   |         |
|                       | IV               | -0.077   |         |
| <b>Cancer status</b>  | tumor free       | -0.130   | <0.001  |
|                       | with tumor       | -0.010   |         |
| <b>residual tumor</b> | R0               | -0.108   | <0.001  |
|                       | R1+R2            | -0.007   |         |
| <b>cancer subtype</b> | ESCA             | -0.083   | <0.001  |
|                       | STAD             | -0.153   |         |
|                       | LIHC             | 0.013    |         |
|                       | PAAD             | 0.102    |         |
|                       | COAD             | -0.150   |         |
|                       | READ             | -0.171   |         |
| <b>Immune subtype</b> | Immune subtype 1 | -0.194   | <0.001  |
|                       | Immune subtype 2 | -0.167   |         |
|                       | Immune subtype 3 | -0.143   |         |
|                       | Immune subtype 4 | -0.201   |         |
|                       | Immune subtype 5 | -0.064   |         |
|                       | Immune subtype 6 | 0.149    |         |
