# Supplementary material for: Immune cell infiltration as a biomarker for the diagnosis and prognosis of digestive system cancer
Source: PubMed Central journal article supplement — Cancer Sci. 2019 Nov 2;110(12):3639–49. doi: 10.1111/cas.14216 (PMC6890448; doi:10.1111/cas.14216), 2019-11-02
Supplement: CAS-110-3639-s016.pdf [file CAS-110-3639-s016.pdf]

**Supplementary table 8. The validation of the prognostic-immune-score in GEO datasets**

| Cancer type | GEO datasets | Number | HR (95% CI) <sup>a</sup> | P value |
|-------------|--------------|--------|--------------------------|---------|
| ESCA        | GSE53625     | 179    | 1.50 (1.02-2.19)         | 0.038   |
| STAD        | GSE26253     | 432    | 1.77 (1.30-2.39)         | <0.001  |
| LIHC        | GSE76427     | 115    | 1.07 (0.61-1.90)         | 0.809   |
| PAAD        | GSE62452     | 69     | 0.71(0.41-1.35)          | 0.240   |
| COAD+READ   | GSE38832     | 92     | 8.25(1.02-66.86)         | 0.010   |
| Total       |              | 887    | 1.52(1.24-1.85)          | <0.001  |

a: The patients were divided into high PIS group and low PIS group.
