# Supplementary material for: Immune cell infiltration as a biomarker for the diagnosis and prognosis of digestive system cancer
Source: PubMed Central journal article supplement — Cancer Sci. 2019 Nov 2;110(12):3639–49. doi: 10.1111/cas.14216 (PMC6890448; doi:10.1111/cas.14216), 2019-11-02
Supplement: CAS-110-3639-s017.pdf [file CAS-110-3639-s017.pdf]

**Supplementary table 9. the relationship between cancer types and the immune subtypes**

| Immune subtype | ESCA | STAD | LIHC | PAAD | COAD | READ |
|----------------|------|------|------|------|------|------|
| 1              | 15   | 67   | 13   | 7    | 28   | 10   |
| 2              | 8    | 21   | 2    | 16   | 8    | 1    |
| 3              | 16   | 26   | 9    | 15   | 72   | 23   |
| 4              | 18   | 30   | 6    | 7    | 22   | 9    |
| 5              | 7    | 5    | 5    | 4    | 23   | 4    |
| 6              | 13   | 31   | 10   | 56   | 30   | 7    |
| Total (n)      | 77   | 180  | 45   | 105  | 183  | 54   |
